# Supplementary material
Source: Royal Society of Chemistry journal article supplement (doi:10.1039/d5su00658a)
Supplement: d5su00658a1.xlsx [file d5su00658a1.xlsx]

## Sheet: LCA results
	In this sheet, the results obtained from LCA are presented. For each molecule, the contributions to the environmental impacts from the reaction steps are presented.
	Global Warming Potential - Units: kg CO2 eq./mol IL
	Sample	Cataion	Anion	Ring formation	Methylation	Alkylation	Anion metathesis	Total
	1	[Hmim]+	Cl-	0.462	0.267	0	0	0.729
	2	[Hmim]+	BF4-	0.506	0.292	0	1.47	2.268
	3	[Hmim]+	PF6-	0.506	0.292	0	3.4	4.198
	4	[C2mim]+	Cl-	0.476	0.179	0.171	0	0.826
	5	[C2mim]+	BF4-	0.522582	0.197	0.188	1.47	2.37758
	6	[C2mim]+	PF6-	0.522582	0.197	0.188	3.4	4.30758
	7	[C4mim]+	Cl-	0.476	0.179	0.216	0	0.871
	8	[C4mim]+	BF4-	0.52291	0.197	0.238	1.47	2.42791
	9	[C4mim]+	PF6-	0.52291	0.197	0.238	3.4	4.35791
	10	[C6mim]+	Cl-	0.476	0.179	0.248	0	0.903
	11	[C6mim]+	BF4-	0.523302	0.197	0.273	1.47	2.4633
	12	[C6mim]+	PF6-	0.523302	0.197	0.273	3.4	4.3933
	13	[C10mim]+	Cl-	0.476	0.179	0.332	0	0.987
	14	[C10mim]+	BF4-	0.521973	0.196	0.364	1.47	2.55197
	15	[C10mim]+	PF6-	0.521973	0.196	0.364	3.4	4.48197
	16	[Amim]+	Cl-	0.476	0.179	0.178	0	0.833
	17	[Amim]+	BF4-	0.521805	0.196	0.195	1.47	2.3828
	18	[Amim]+	PF6-	0.521805	0.196	0.195	3.4	4.3128
	19	[Bzmim]	Cl-	0.476	0.179	0.416	0	1.071
	20	[Bzmim]	BF4-	0.522009	0.196	0.457	1.47	2.64501
	21	[Bzmim]	PF6-	0.522009	0.196	0.457	3.4	4.57501
	22	[C4dmim]+	Cl-	0.552	0.172	0.217	0	0.941
	23	[C4dmim]+	BF4-	0.60598	0.188	0.238	1.47	2.50198
	24	[C4dmim]+	PF6-	0.60598	0.188	0.238	3.4	4.43198
	25	[C8mim]+	Cl-	0.467	0.178	0.291	0	0.936
	26	[C8mim]+	BF4-	0.5134	0.196	0.32	1.47	2.4994
	27	[C8mim]+	PF6-	0.5134	0.196	0.32	3.4	4.4294
	28	[Phmim]+	Cl-	0.467	0.178	0.37	0	1.015
	29	[Phmim]+	BF4-	0.512405	0.196	0.406	1.47	2.5844
	30	[Phmim]+	PF6-	0.512405	0.196	0.406	3.4	4.5144
			Average	0.511624	0.199033
			Imidazol ->	0.710658
	Human Toxicity Potential - Units: kg DCB eq./mol IL
	Sample	Cataion	Anion	Ring formation	Methylation	Alkylation	Anion metathesis	Total
	1	[Hmim]+	Cl-	6.08	0.0178	0	0	6.0978
	2	[Hmim]+	BF4-	6.67	0.0196	0	2.82	9.5096
	3	[Hmim]+	PF6-	6.67	0.0196	0	7.74	14.4296
	4	[C2mim]+	Cl-	6.15	-0.0459	0.127	0	6.2311
	5	[C2mim]+	BF4-	6.76132	-0.0504	0.14	2.82	9.67092
	6	[C2mim]+	PF6-	6.76132	-0.0504	0.14	7.74	14.5909
	7	[C4mim]+	Cl-	6.15	-0.0459	0.18	0	6.2841
	8	[C4mim]+	BF4-	6.76556	-0.0504	0.198	2.82	9.73316
	9	[C4mim]+	PF6-	6.76556	-0.0504	0.198	7.74	14.6532
	10	[C6mim]+	Cl-	6.15	-0.0459	0.231	0	6.3351
	11	[C6mim]+	BF4-	6.77063	-0.0505	0.254	2.82	9.79413
	12	[C6mim]+	PF6-	6.77063	-0.0505	0.254	7.74	14.7141
	13	[C10mim]+	Cl-	6.15	-0.0459	0.337	0	6.4411
	14	[C10mim]+	BF4-	6.75344	-0.0503	0.37	2.82	9.89314
	15	[C10mim]+	PF6-	6.75344	-0.0503	0.37	7.74	14.8131
	16	[Amim]+	Cl-	6.15	-0.0459	0.115	0	6.2191
	17	[Amim]+	BF4-	6.75126	-0.0503	0.126	2.82	9.64696
	18	[Amim]+	PF6-	6.75126	-0.0503	0.126	7.74	14.567
	19	[Bzmim]	Cl-	6.15	-0.0459	0.251	0	6.3551
	20	[Bzmim]	BF4-	6.75391	-0.0504	0.275	2.82	9.79851
	21	[Bzmim]	PF6-	6.75391	-0.0504	0.275	7.74	14.7185
	22	[C4dmim]+	Cl-	6.19	-0.0511	0.181	0	6.3199
	23	[C4dmim]+	BF4-	6.79282	-0.056	0.198	2.82	9.75482
	24	[C4dmim]+	PF6-	6.79282	-0.056	0.198	7.74	14.6748
	25	[C8mim]+	Cl-	6.15	-0.0462	0.284	0	6.3878
	26	[C8mim]+	BF4-	6.7619	-0.0508	0.313	2.82	9.8441
	27	[C8mim]+	PF6-	6.7619	-0.0508	0.313	7.74	14.7641
	28	[Phmim]+	Cl-	6.15	-0.0462	0.224	0	6.3278
	29	[Phmim]+	BF4-	6.7488	-0.0508	0.245	2.82	9.763
	30	[Phmim]+	PF6-	6.7488	-0.0507	0.245	7.74	14.6831
			Average	6.55098	-0.04272
			Imidazol ->	6.50826
	Freshwater aquatic ecotoxicity (kg DCB eq./mol IL)
	Sample	Cataion	Anion	Ring formation	Methylation	Alkylation	Anion metathesis	Total
	1	[Hmim]+	Cl-	0.177	0.00882	0	0	0.18582
	2	[Hmim]+	BF4-	0.194	0.00967	0	1.11	1.31367
	3	[Hmim]+	PF6-	0.194	0.00967	0	2.01	2.21367
	4	[C2mim]+	Cl-	0.183	-0.0264	0.0675	0	0.2241
	5	[C2mim]+	BF4-	0.200499	-0.029	0.0742	1.11	1.3557
	6	[C2mim]+	PF6-	0.200499	-0.029	0.0742	2.01	2.2557
	7	[C4mim]+	Cl-	0.183	-0.0264	0.0961	0	0.2527
	8	[C4mim]+	BF4-	0.200625	-0.029	0.106	1.11	1.38763
	9	[C4mim]+	PF6-	0.200625	-0.029	0.106	2.01	2.28763
	10	[C6mim]+	Cl-	0.183	-0.0264	0.124	0	0.2806
	11	[C6mim]+	BF4-	0.200776	-0.029	0.136	1.11	1.41778
	12	[C6mim]+	PF6-	0.200776	-0.029	0.136	2.01	2.31778
	13	[C10mim]+	Cl-	0.183	-0.0264	0.181	0	0.3376
	14	[C10mim]+	BF4-	0.200266	-0.0289	0.198	1.11	1.47937
	15	[C10mim]+	PF6-	0.200266	-0.0289	0.198	2.01	2.37937
	16	[Amim]+	Cl-	0.183	-0.0264	0.0643	0	0.2209
	17	[Amim]+	BF4-	0.200201	-0.0289	0.0705	1.11	1.3518
	18	[Amim]+	PF6-	0.200201	-0.0289	0.0705	2.01	2.2518
	19	[Bzmim]	Cl-	0.183	-0.0264	0.13	0	0.2866
	20	[Bzmim]	BF4-	0.20028	-0.0289	0.143	1.11	1.42438
	21	[Bzmim]	PF6-	0.20028	-0.0289	0.143	2.01	2.32438
	22	[C4dmim]+	Cl-	0.206	-0.0299	0.0963	0	0.2724
	23	[C4dmim]+	BF4-	0.226113	-0.0328	0.106	1.11	1.40931
	24	[C4dmim]+	PF6-	0.226113	-0.0328	0.106	2.01	2.30931
	25	[C8mim]+	Cl-	0.179	-0.0266	0.152	0	0.3044
	26	[C8mim]+	BF4-	0.196774	-0.0293	0.167	1.11	1.44447
	27	[C8mim]+	PF6-	0.196774	-0.0293	0.167	2.01	2.34447
	28	[Phmim]+	Cl-	0.179	-0.0266	0.116	0	0.2684
	29	[Phmim]+	BF4-	0.196393	-0.0292	0.128	1.11	1.40519
	30	[Phmim]+	PF6-	0.196393	-0.0292	0.128	2.01	2.30519
			Average	0.195695	-0.024778
			Imidazol ->	0.170917
				Marine aquatic ecotoxicity (kg DCB eq./mol IL)
	Sample	Cataion	Anion	Ring formation	Methylation	Alkylation	Anion metathesis	Total
	1	[Hmim]+	Cl-	0.311	0.0461	0	0	0.3571
	2	[Hmim]+	BF4-	0.341	0.0505	0	8.87	9.2615
	3	[Hmim]+	PF6-	0.341	0.0505	0	56.5	56.8915
	4	[C2mim]+	Cl-	0.319	-0.0247	0.124	0	0.4183
	5	[C2mim]+	BF4-	0.349951	-0.0272	0.136	8.87	9.32875
	6	[C2mim]+	PF6-	0.349951	-0.0272	0.136	56.5	56.9588
	7	[C4mim]+	Cl-	0.319	-0.0247	0.177	0	0.4713
	8	[C4mim]+	BF4-	0.35017	-0.0272	0.194	8.87	9.38697
	9	[C4mim]+	PF6-	0.35017	-0.0272	0.194	56.5	57.017
	10	[C6mim]+	Cl-	0.319	-0.0247	0.228	0	0.5223
	11	[C6mim]+	BF4-	0.350433	-0.0272	0.25	8.87	9.44323
	12	[C6mim]+	PF6-	0.35017	-0.0272	0.25	56.5	57.073
	13	[C10mim]+	Cl-	0.319	-0.0247	0.333	0	0.6273
	14	[C10mim]+	BF4-	0.349543	-0.0271	0.365	8.87	9.55744
	15	[C10mim]+	PF6-	0.349543	-0.0271	0.365	56.5	57.1874
	16	[Amim]+	Cl-	0.319	-0.0247	0.131	0	0.4253
	17	[Amim]+	BF4-	0.34943	-0.0271	0.144	8.87	9.33633
	18	[Amim]+	PF6-	0.34943	-0.0271	0.144	56.5	56.9663
	19	[Bzmim]	Cl-	0.319	-0.0247	0.27	0	0.5643
	20	[Bzmim]	BF4-	0.349567	-0.0271	0.297	8.87	9.48947
	21	[Bzmim]	PF6-	0.349567	-0.0271	0.297	56.5	57.1195
	22	[C4dmim]+	Cl-	0.413	-0.029	0.177	0	0.561
	23	[C4dmim]+	BF4-	0.452984	-0.0318	0.194	8.87	9.48518
	24	[C4dmim]+	PF6-	0.452984	-0.0318	0.194	56.5	57.1152
	25	[C8mim]+	Cl-	0.314	-0.025	0.28	0	0.569
	26	[C8mim]+	BF4-	0.34553	-0.0275	0.308	8.87	9.49603
	27	[C8mim]+	PF6-	0.34553	-0.0275	0.308	56.5	57.126
	28	[Phmim]+	Cl-	0.314	-0.025	0.241	0	0.53
	29	[Phmim]+	BF4-	0.34486	-0.0274	0.264	8.87	9.45146
	30	[Phmim]+	PF6-	0.34486	-0.0274	0.264	56.5	57.0815
			Average	0.347756	-0.01931
			Imidazol ->	0.328446
	Terrestrial Ecotoxicity Potential - Units: g DCB eq./mol IL
	Sample	Cataion	Anion	Ring formation	Methylation	Alkylation	Anion metathesis	Total
	1	[Hmim]+	Cl-	2.87	0.983	0	0	3.853
	2	[Hmim]+	BF4-	3.14	1.08	0	13.4	17.62
	3	[Hmim]+	PF6-	3.14	1.08	0	36.1	40.32
	4	[C2mim]+	Cl-	2.97	0.355	1.31	0	4.635
	5	[C2mim]+	BF4-	3.26224	0.39	1.44	13.4	18.4922
	6	[C2mim]+	PF6-	3.26224	0.39	1.44	36.1	41.1922
	7	[C4mim]+	Cl-	2.97	0.355	1.87	0	5.195
	8	[C4mim]+	BF4-	3.26429	0.39	2.05	13.4	19.1043
	9	[C4mim]+	PF6-	3.26429	0.39	2.05	36.1	41.8043
	10	[C6mim]+	Cl-	2.97	0.355	2.41	0	5.735
	11	[C6mim]+	BF4-	3.26674	0.39	2.65	13.4	19.7067
	12	[C6mim]+	PF6-	3.26674	0.39	2.65	36.1	42.4067
	13	[C10mim]+	Cl-	2.97	0.355	3.52	0	6.845
	14	[C10mim]+	BF4-	3.25844	0.389	3.86	13.4	20.9074
	15	[C10mim]+	PF6-	3.25844	0.389	3.86	36.1	43.6074
	16	[Amim]+	Cl-	2.97	0.355	1.21	0	4.535
	17	[Amim]+	BF4-	3.25739	0.389	1.32	13.4	18.3664
	18	[Amim]+	PF6-	3.25739	0.389	1.32	36.1	41.0664
	19	[Bzmim]	Cl-	2.97	0.355	2.95	0	6.275
	20	[Bzmim]	BF4-	3.25867	0.39	3.24	13.4	20.2887
	21	[Bzmim]	PF6-	3.25867	0.39	3.24	36.1	42.9887
	22	[C4dmim]+	Cl-	3.4	0.277	1.87	0	5.547
	23	[C4dmim]+	BF4-	3.73429	0.304	2.05	13.4	19.4883
	24	[C4dmim]+	PF6-	3.73429	0.304	2.05	36.1	42.1883
	25	[C8mim]+	Cl-	2.89	0.35	2.96	0	6.2
	26	[C8mim]+	BF4-	3.17975	0.385	3.26	13.4	20.2248
	27	[C8mim]+	PF6-	3.17975	0.385	3.26	36.1	42.9248
	28	[Phmim]+	Cl-	2.89	0.35	2.63	0	5.87
	29	[Phmim]+	BF4-	3.17359	0.384	2.88	13.4	19.8376
	30	[Phmim]+	PF6-	3.17359	0.384	2.88	36.1	42.5376
			Average	3.18203	0.435733
			Imidazol ->	3.61776

## Sheet: GC groups
	In this sheet, each molecule is decomposed into functional groups that have been described in the main paper.
	The column "status" indicates if a molecule was used as part of the training or the validation set. This selection was done at random.
						Functional groups
	Sample	Cataion	Anion	Name	Status	Imidazol	C-(2H,C,N)	C-(3H,C)	C-(2H,2C)	Cb	Cd-(C)	C-(3H,Ci)	Cl	BF4	PF6
	1	[Hmim]+	Cl-	1-methylimidazolium chloride	Validation	1	0	0	0	0	0	0	1	0	0
	2	[Hmim]+	BF4-	1-methylimidazolium tetrafluoroborate	Training	1	0	0	0	0	0	0	0	1	0
	3	[Hmim]+	PF6-	1-methylimidazolium hexafluorophosphate	Training	1	0	0	0	0	0	0	0	0	1
	4	[C2mim]+	Cl-	1-ethyl-3-methylimidazolium chloride	Validation	1	1	1	0	0	0	0	1	0	0
	5	[C2mim]+	BF4-	1-ethyl-3-methylimidazolium tetrafluoroborate	Training	1	1	1	0	0	0	0	0	1	0
	6	[C2mim]+	PF6-	1-ethyl-3-methylimidazolium hexafluorophosphate	Training	1	1	1	0	0	0	0	0	0	1
	7	[C4mim]+	Cl-	1-butyl-3-methylimidazolium chloride	Training	1	1	1	2	0	0	0	1	0	0
	8	[C4mim]+	BF4-	1-butyl-3-methylimidazolium tetrafluoroborate	Validation	1	1	1	2	0	0	0	0	1	0
	9	[C4mim]+	PF6-	1-butyl-3-methylimidazolium hexafluorophosphate	Validation	1	1	1	2	0	0	0	0	0	1
	10	[C6mim]+	Cl-	1-hexyl-3-methylimidazolium chloride	Validation	1	1	1	4	0	0	0	1	0	0
	11	[C6mim]+	BF4-	1-hexyl-3-methylimidazolium tetrafluoroborate	Validation	1	1	1	4	0	0	0	0	1	0
	12	[C6mim]+	PF6-	1-hexyl-3-methylimidazolium hexafluorophosphate	Training	1	1	1	4	0	0	0	0	0	1
	13	[C10mim]+	Cl-	1-decyl-3-methylimidazolium chloride	Training	1	1	1	8	0	0	0	1	0	0
	14	[C10mim]+	BF4-	1-decyl-3-methylimidazolium tetrafluoroborate	Validation	1	1	1	8	0	0	0	0	1	0
	15	[C10mim]+	PF6-	1-decyl-3-methylimidazolium hexafluorophosphate	Training	1	1	1	8	0	0	0	0	0	1
	16	[Amim]+	Cl-	1-allyl-3-methylimidazolium chloride	Validation	1	1	0	0	0	1	0	1	0	0
	17	[Amim]+	BF4-	1-allyl-3-methylimidazolium tetrafluoroborate	Training	1	1	0	0	0	1	0	0	1	0
	18	[Amim]+	PF6-	1-allyl-3-methylimidazolium hexafluorophosphate	Training	1	1	0	0	0	1	0	0	0	1
	19	[Bzmim]	Cl-	1-benzyl-3-methylimidazolium chloride	Training	1	1	0	0	1	0	1	1	0	0
	20	[Bzmim]	BF4-	1-benzyl-3-methylimidazolium tetrafluoroborate	Validation	1	1	0	0	1	0	1	0	1	0
	21	[Bzmim]	PF6-	1-benzyl-3-methylimidazolium hexafluorophosphate	Validation	1	1	0	0	1	0	1	0	0	1
	22	[C4dmim]+	Cl-	1-butyl-2,3-dimethylimidazolium chloride	Training	1	1	1	2	0	0	1	1	0	0
	23	[C4dmim]+	BF4-	1-butyl-2,3-dimethylimidazolium tetrafluoroborate	Validation	1	1	1	2	0	0	1	0	1	0
	24	[C4dmim]+	PF6-	1-butyl-2,3-dimethylimidazolium hexafluorophosphate	Validation	1	1	1	2	0	0	1	0	0	1
	25	[C8mim]+	Cl-	1-Octyl-3-methylimidazolium chloride	Training	1	1	1	6	0	0	0	1	0	0
	26	[C8mim]+	BF4-	1-Octyl-3-methylimidazolium tetrafluoroborate	Training	1	1	1	6	0	0	0	0	1	0
	27	[C8mim]+	PF6-	1-Octyl-3-methylimidazolium hexafluorophosphate	Training	1	1	1	6	0	0	0	0	0	1
	28	[Phmim]+	Cl-	1-Phenyl-imidazolium chloride	Training	1	0	0	0	1	0	0	1	0	0
	29	[Phmim]+	BF4-	1-Phenyl-imidazolium tetrafluoroborate	Training	1	0	0	0	1	0	0	0	1	0
	30	[Phmim]+	PF6-	1-Phenyl-imidazolium hexafluorophosphate	Training	1	0	0	0	1	0	0	0	0	1

## Sheet: GC model
	In this sheet, the results for the coefficients of the group contribution model are presented.
	The results correcpond to the models obtained via boostrap sampling and k-fold cross validation
		Global Warming Potential - Units: kg CO2 eq./mol IL
				k_fold
		Group	Coefficient	2	3	6	9	18 (LOOCV)	Bootstrap
		Intercept	beta_0	1.7562	1.6942	1.6546	1.6412	1.6142	1.6525
		Imidazol	beta_1	0.7164	0.7164	0.7164	0.7164	0.7164	0.7164
		C-(2H,C,N)	beta_2	0.0455	0.1111	0.059	0.0487	0.0393	0.0735
		C-(3H,C)	beta_3	0.0048	-0.0002	0.0915	0.1151	0.1515	0.0822
		C-(2H,2C)	beta_4	0.0206	0.0212	0.0214	0.0214	0.0214	0.0214
		Cb-(C) or Cb-(N)	beta_5	0.259	0.2336	0.363	0.3764	0.4031	0.3582
		Cv-(C)	beta_6	0.0025	0.0022	0.0952	0.1191	0.1557	0.0744
		C-(3H,Cim)	beta_7	0.0484	0.0546	-0.0022	0.0025	0.0064	-0.0109
		Cl	beta_8	-1.6421	-1.6431	-1.6419	-1.6417	-1.6415	-1.6339
		BF4	beta_9	-0.1479	-0.1439	-0.1438	-0.1439	-0.1441	-0.1471
		PF6	beta_10	1.79	1.7869	1.7857	1.7857	1.7856	1.7811
			RMSE	0.0825	0.116	0.0593	0.0561	0.0392	0.076496
		Human Toxicity Potential - Units: kg DCB eq./mol IL
				k_fold
		Group	Coefficient	2	3	6	9	18 (LOOCV)	Bootstrap
		Intercept	beta_0	3.6007	3.5639	3.5379	3.5293	3.5119	3.5399
		Imidazol	beta_1	6.5092	6.5092	6.5092	6.5092	6.5092	6.5092
		C-(2H,C,N)	beta_2	0.0382	0.0765	0.0422	0.0356	0.029	0.0529
		C-(3H,C)	beta_3	0.0183	0.015	0.0742	0.0894	0.1133	0.0672
		C-(2H,2C)	beta_4	0.0275	0.028	0.0281	0.0281	0.0281	0.028
		Cb-(C) or Cb-(N)	beta_5	0.1528	0.1386	0.2199	0.2287	0.2461	0.2172
		Cv-(C)	beta_6	-0.0044	-0.0035	0.0577	0.073	0.097	0.0433
		C-(3H,Cim)	beta_7	0.0264	0.0298	-0.0016	0.0012	0.004	-0.0174
		Cl	beta_8	-3.5342	-3.5357	-3.5364	-3.5363	-3.5362	-3.5262
		BF4	beta_9	-0.6969	-0.6929	-0.6921	-0.6921	-0.6921	-0.6947
		PF6	beta_10	4.2312	4.2286	4.2285	4.2284	4.2283	4.2209
			RMSE	0.2822	0.2808	0.2586	0.2537	0.2634	0.29387
		Freshwater aquatic ecotoxicity (kg DCB eq./mol IL)
				k_fold
		Group	Coefficient	2	3	6	9	18 (LOOCV)	Bootstrap
		Intercept	beta_0	1.0829	1.0636	1.0497	1.045	1.0357	1.0491
		Imidazol	beta_1	0.1731	0.1731	0.1731	0.1731	0.1731	0.1731
		C-(2H,C,N)	beta_2	0.021	0.0409	0.0222	0.0185	0.0148	0.0281
		C-(3H,C)	beta_3	0.0085	0.0072	0.0394	0.0477	0.0607	0.0351
		C-(2H,2C)	beta_4	0.0149	0.0151	0.0151	0.0151	0.0151	0.0151
		Cb-(C) or Cb-(N)	beta_5	0.0791	0.0711	0.1143	0.1189	0.1283	0.1129
		Cv-(C)	beta_6	0.0005	0.0012	0.0343	0.0427	0.0557	0.0263
		C-(3H,Cim)	beta_7	0.0135	0.0153	-0.0012	0.0003	0.0019	-0.0062
		Cl	beta_8	-1.0478	-1.0484	-1.0487	-1.0486	-1.0486	-1.0452
		BF4	beta_9	0.0718	0.0738	0.0742	0.0742	0.0741	0.0722
		PF6	beta_10	0.976	0.9746	0.9745	0.9745	0.9744	0.9729
			RMSE	0.0264	0.0378	0.02	0.0189	0.0142	0.027334
		Marine aquatic ecotoxicity (kg DCB eq./mol IL)
				k_fold
		Group	Coefficient	2	3	6	9	18 (LOOCV)	Bootstrap
		Intercept	beta_0	21.8771	21.8373	21.8097	21.8005	21.782	21.8354
		Imidazol	beta_1	0.3335	0.3335	0.3335	0.3335	0.3335	0.3335
		C-(2H,C,N)	beta_2	0.0389	0.0806	0.0441	0.037	0.0301	0.0606
		C-(3H,C)	beta_3	0.007	0.0037	0.0668	0.083	0.1084	0.071
		C-(2H,2C)	beta_4	0.0274	0.0278	0.0279	0.0279	0.0279	0.0276
		Cb-(C) or Cb-(N)	beta_5	0.1652	0.1495	0.2366	0.2458	0.2643	0.2389
		Cv-(C)	beta_6	0.0063	0.0071	0.072	0.0884	0.1139	0.0449
		C-(3H,Cim)	beta_7	0.0288	0.0323	-0.0023	0.0007	0.0036	-0.0959
		Cl	beta_8	-21.8046	-21.8059	-21.8062	-21.8061	-21.806	-21.7501
		BF4	beta_9	-12.9169	-12.9128	-12.9122	-12.9122	-12.9122	-12.911
		PF6	beta_10	34.7215	34.7187	34.7184	34.7183	34.7182	34.6611
			RMSE	0.0549	0.076	0.0473	0.0451	0.0349	0.180182
		Terrestrial Ecotoxicity Potential - Units: g DCB eq./mol IL
				k_fold
		Group	Coefficient	2	3	6	9	18 (LOOCV)	Bootstrap
		Intercept	beta_0	17.4154	16.9831	16.699	16.6042	16.4137	16.6888
		Imidazol	beta_1	3.6587	3.6587	3.6587	3.6587	3.6587	3.6587
		C-(2H,C,N)	beta_2	0.3559	0.8191	0.4551	0.3882	0.3224	0.555
		C-(3H,C)	beta_3	0.1351	0.0893	0.7279	0.8891	1.1454	0.6655
		C-(2H,2C)	beta_4	0.29	0.2946	0.2955	0.2955	0.2956	0.2951
		Cb-(C) or Cb-(N)	beta_5	1.8401	1.6778	2.5967	2.6921	2.883	2.5642
		Cv-(C)	beta_6	-0.0757	-0.08	0.5775	0.7408	0.9976	0.4415
		C-(3H,Cim)	beta_7	0.3329	0.3661	-0.0146	0.014	0.041	-0.0921
		Cl	beta_8	-16.6579	-16.6714	-16.6748	-16.6737	-16.6727	-16.6238
		BF4	beta_9	-3.0657	-3.0226	-3.0155	-3.0158	-3.016	-3.0314
		PF6	beta_10	19.7236	19.694	19.6903	19.6895	19.6887	19.6551
			RMSE	0.5623	0.8077	0.3924	0.3687	0.2603	0.52869

## Sheet: GC model results
	In this sheet, the results for the enviromental impacts are presented. The results correspond to the values obtained via LCA analysis, and from the group contribution model using the bootstrap sampling and LOOCV
	Status	Name	GWP (LCA)	GWP (BS)	GWP (LOOCV)	HTP (LCA)	HTP (BS)	HTP (LOOCV)	FAETP (LCA)	FAETP (BS)	FAETP (LOOCV)	MAETP (LCA)	MAETP (BS)	MAETP (LOOCV)	TETP (LCA)	TETP (BS)	TETP (LOOCV)
	Validation	[Hmim]Cl	0.729	0.735	0.6891	6.0978	6.5229	6.4849	0.18582	0.177	0.1602	0.3571	0.4188	0.3095	3.853	3.7237	3.3997
	Training	[Hmim]BF4	2.268	2.2218	2.1865	9.5096	9.3544	9.329	1.31367	1.2944	1.2829	9.2615	9.2579	9.2033	17.62	17.3161	17.0564
	Training	[Hmim]PF6	4.198	4.15	4.1162	14.4296	14.27	14.2494	2.21367	2.1951	2.1832	56.8915	56.83	56.8337	40.32	40.0026	39.7611
	Validation	[C2mim]Cl	0.826	0.8907	0.8799	6.2311	6.643	6.6272	0.2241	0.2402	0.2357	0.4183	0.5504	0.448	4.635	4.9442	4.8675
	Training	[C2mim]BF4	2.37758	2.3775	2.3773	9.67092	9.4745	9.4713	1.3557	1.3576	1.3584	9.32875	9.3895	9.3418	18.4922	18.5366	18.5242
	Training	[C2mim]PF6	4.30758	4.3057	4.307	14.5909	14.3901	14.3917	2.2557	2.2583	2.2587	56.9588	56.9616	56.9722	41.1922	41.2231	41.2289
	Training	[C4mim]Cl	0.871	0.9335	0.9227	6.2841	6.699	6.6834	0.2527	0.2704	0.2659	0.4713	0.6056	0.5038	5.195	5.5344	5.4587
	Validation	[C4mim]BF4	2.42791	2.4203	2.4201	9.73316	9.5305	9.5275	1.38763	1.3878	1.3886	9.38697	9.4447	9.3976	19.1043	19.1268	19.1154
	Validation	[C4mim]PF6	4.35791	4.3485	4.3498	14.6532	14.4461	14.4479	2.28763	2.2885	2.2889	57.017	57.0168	57.028	41.8043	41.8133	41.8201
	Validation	[C6mim]Cl	0.903	0.9763	0.9655	6.3351	6.755	6.7396	0.2806	0.3006	0.2961	0.5223	0.6608	0.5596	5.735	6.1246	6.0499
	Validation	[C6mim]BF4	2.4633	2.4631	2.4629	9.79413	9.5865	9.5837	1.41778	1.418	1.4188	9.44323	9.4999	9.4534	19.7067	19.717	19.7066
	Training	[C6mim]PF6	4.3933	4.3913	4.3926	14.7141	14.5021	14.5041	2.31778	2.3187	2.3191	57.073	57.072	57.0838	42.4067	42.4035	42.4113
	Training	[C10mim]Cl	0.987	1.0619	1.0511	6.4411	6.867	6.852	0.3376	0.361	0.3565	0.6273	0.7712	0.6712	6.845	7.305	7.2323
	Validation	[C10mim]BF4	2.55197	2.5487	2.5485	9.89314	9.6985	9.6961	1.47937	1.4784	1.4792	9.55744	9.6103	9.565	20.9074	20.8974	20.889
	Training	[C10mim]PF6	4.48197	4.4769	4.4782	14.8131	14.6141	14.6165	2.37937	2.3791	2.3795	57.1874	57.1824	57.1954	43.6074	43.5839	43.5937
	Validation	[Amim]Cl	0.833	0.8829	0.8841	6.2191	6.6191	6.6109	0.2209	0.2314	0.2307	0.4253	0.5243	0.4535	4.535	4.7202	4.7197
	Training	[Amim]BF4	2.3828	2.3697	2.3815	9.64696	9.4506	9.455	1.3518	1.3488	1.3534	9.33633	9.3634	9.3473	18.3664	18.3126	18.3764
	Training	[Amim]PF6	4.3128	4.2979	4.3112	14.567	14.3662	14.3754	2.2518	2.2495	2.2537	56.9663	56.9355	56.9777	41.0664	40.9991	41.0811
	Training	[Bzmim]Cl	1.071	1.1558	1.1379	6.3551	6.7756	6.764	0.2866	0.3118	0.3052	0.5643	0.6224	0.6075	6.275	6.7508	6.6461
	Validation	[Bzmim]BF4	2.64501	2.6426	2.6353	9.79851	9.6071	9.6081	1.42438	1.4292	1.4279	9.48947	9.4615	9.5013	20.2887	20.3432	20.3028
	Validation	[Bzmim]PF6	4.57501	4.5708	4.565	14.7185	14.5227	14.5285	2.32438	2.3299	2.3282	57.1195	57.0336	57.1317	42.9887	43.0297	43.0075
	Training	[C4dmim]Cl	0.941	0.9226	0.9291	6.3199	6.6816	6.6874	0.2724	0.2642	0.2678	0.561	0.5097	0.5074	5.547	5.4423	5.4997
	Validation	[C4dmim]BF4	2.50198	2.4094	2.4265	9.75482	9.5131	9.5315	1.40931	1.3816	1.3905	9.48518	9.3488	9.4012	19.4883	19.0347	19.1564
	Validation	[C4dmim]PF6	4.43198	4.3376	4.3562	14.6748	14.4287	14.4519	2.30931	2.2823	2.2908	57.1152	56.9209	57.0316	42.1883	41.7212	41.8611
	Training	[C8mim]Cl	0.936	1.0191	1.0083	6.3878	6.811	6.7958	0.3044	0.3308	0.3263	0.569	0.716	0.6154	6.2	6.7148	6.6411
	Training	[C8mim]BF4	2.4994	2.5059	2.5057	9.8441	9.6425	9.6399	1.44447	1.4482	1.449	9.49603	9.5551	9.5092	20.2248	20.3072	20.2978
	Training	[C8mim]PF6	4.4294	4.4341	4.4354	14.7641	14.5581	14.5603	2.34447	2.3489	2.3493	57.126	57.1272	57.1396	42.9248	42.9937	43.0025
	Training	[Phmim]Cl	1.015	1.0932	1.0922	6.3278	6.7401	6.731	0.2684	0.2899	0.2885	0.53	0.6577	0.5738	5.87	6.2879	6.2827
	Training	[Phmim]BF4	2.5844	2.58	2.5896	9.763	9.5716	9.5751	1.40519	1.4073	1.4112	9.45146	9.4968	9.4676	19.8376	19.8803	19.9394
	Training	[Phmim]PF6	4.5144	4.5082	4.5193	14.6831	14.4872	14.4955	2.30519	2.308	2.3115	57.0815	57.0689	57.098	42.5376	42.5668	42.6441
